# Supplementary material
Source: PubMed Central journal article supplement (PMC2997858)
Supplement: NIHMS248030-supplement-01.pdf [file NIHMS248030-supplement-01.pdf]

## Supporting Information

# Structure and lipid interactions of an anti-inflammatory and anti-atherogenic 10 residue Class G\* Apolipoprotein J peptide using solution NMR<sup>#</sup>

*Vinod K. Mishra*<sup>1, \*</sup>, *Mayakonda N. Palgunachari*<sup>1</sup>, *Jason S. Hudson*<sup>2</sup>, *Ronald Shin*<sup>3</sup>, *Tamara D. Keenum*<sup>1</sup>, *N. Rama Krishna*<sup>3</sup>, and *G. M. Anantharamaiah*<sup>1,3,†</sup>

<sup>1</sup>The Atherosclerosis Research Unit, Department of Medicine, <sup>2</sup>Department of Chemistry, <sup>3</sup>and Department of Biochemistry and Molecular Genetics and Comprehensive Cancer Center, UAB Medical Center, Birmingham, AL 35294, USA

\*BDB Room D698, 1530 3<sup>rd</sup> Avenue South, UAB Medical Center, Birmingham, AL 35294-0012

Tel (205)934-0433, Fax (205)975-8079, e-mail: [vmishra@uab.edu](mailto:vmishra@uab.edu)

## Figure S1

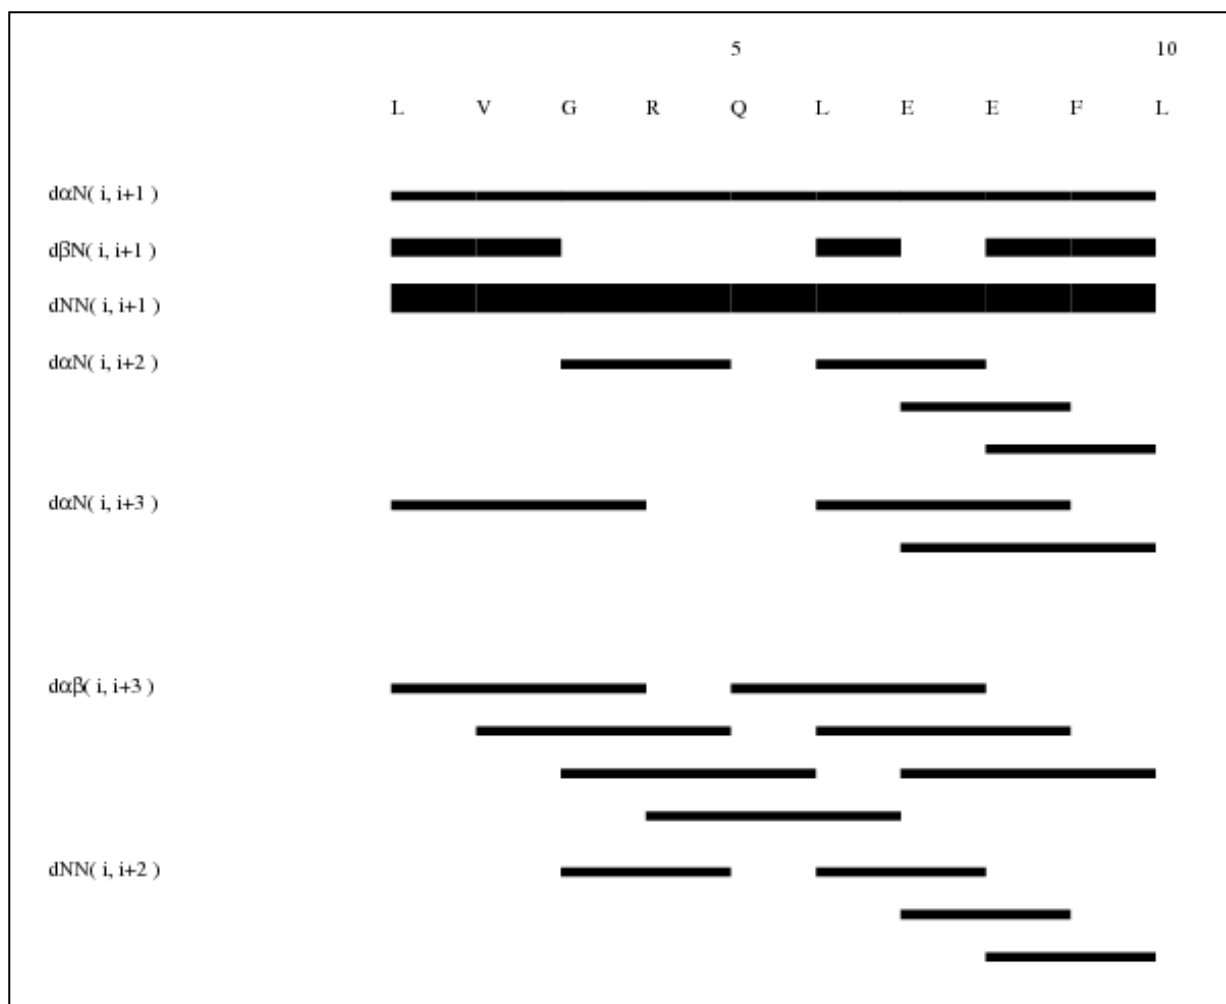

**Figure S1.** Schematic representation of the sequential and long-range NOEs observed for [113-122]apoJ in the presence of DPC micelle. Line thickness for the sequential NOEs is proportional to their measured intensity. Medium and long range NOEs were not classified as strong, medium, or weak. NOESY spectrum was obtained using a mixing time of 200 msec.
